# Supplementary material for: Global DNA Methylation Profiling Reveals Differentially Methylated CpGs between Salivary Gland Pleomorphic Adenomas with Distinct Clinical Course
Source: MDPI journal article supplement (doi:10.3390/ijms23115962), 2022-05-25
Supplement: s1 [file s1]

Supplementary Figure S1. Mean methylation differences between fast-growing (dark grey) and slow-growing (light grey) tumors for each CG in given assay by DNA bisulfite pyrosequencing. The obtained  $p$  values were assigned with asterisks, as follows: \*  $p \leq 0.05$ ; \*\*  $p \leq 0.01$ ; \*\*\*  $p \leq 0.001$ ; \*\*\*\*  $p \leq 0.0001$ . N/A - CpG dinucleotide not annotated in GRCh37/hg19 database

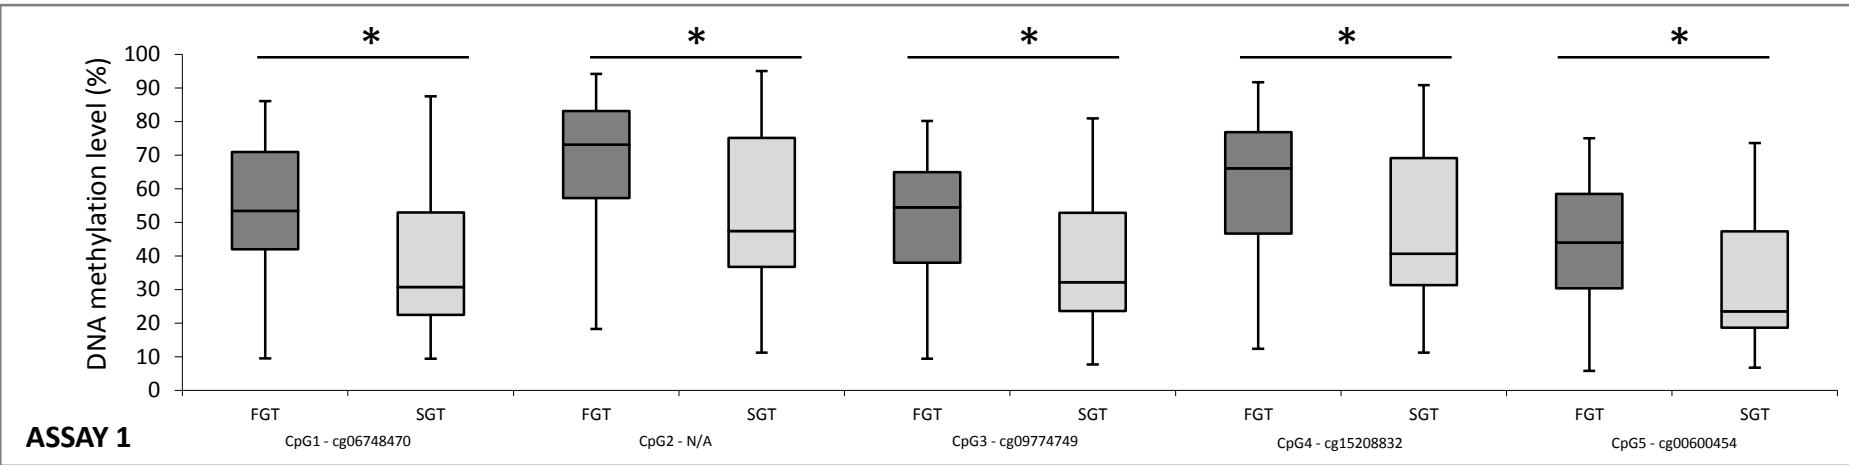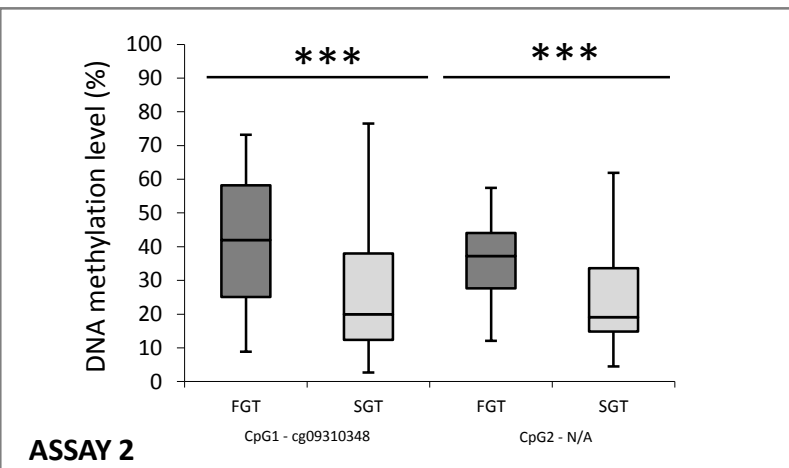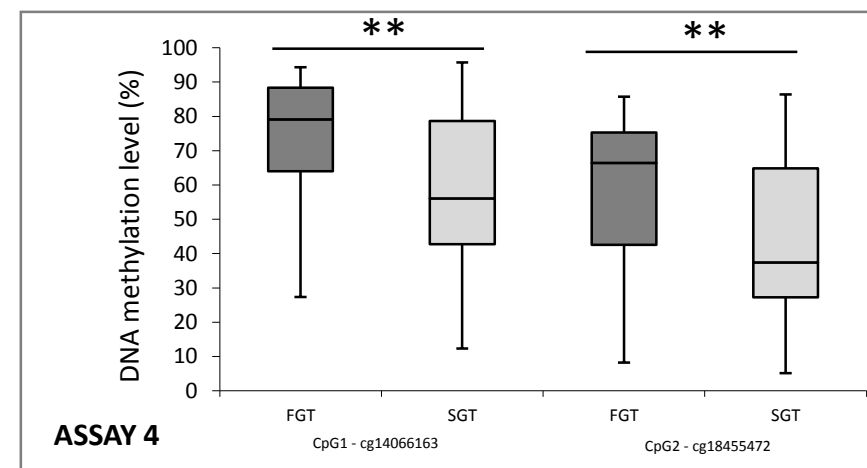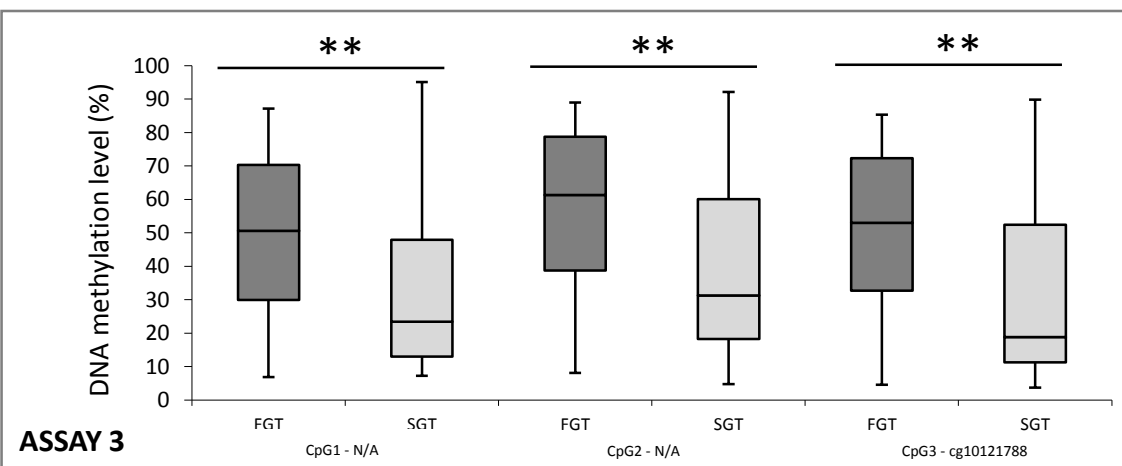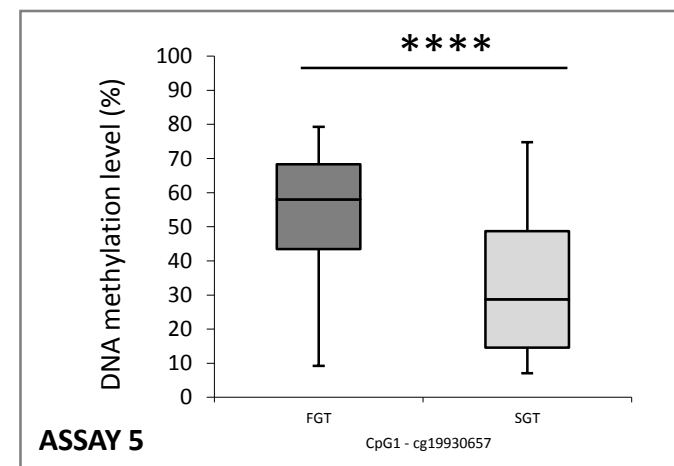

**ASSAY 1**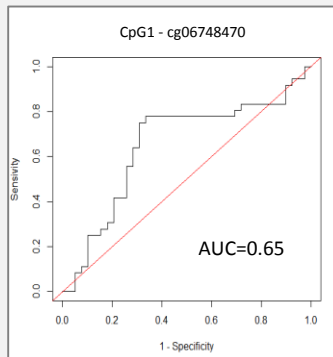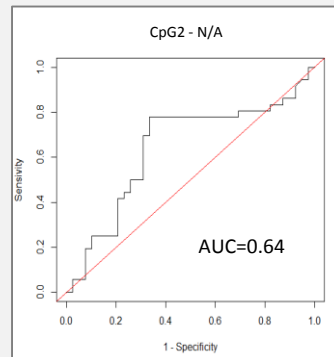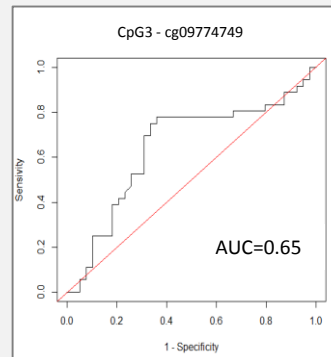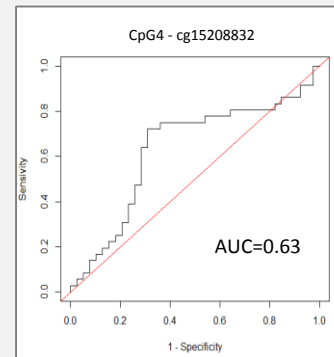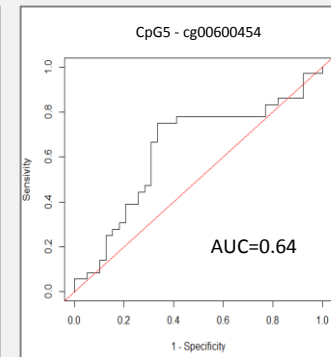**ASSAY 2**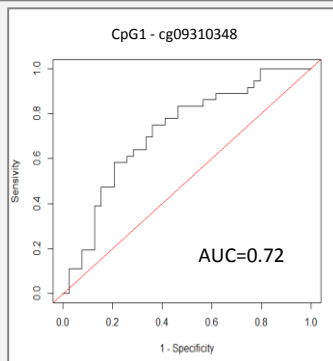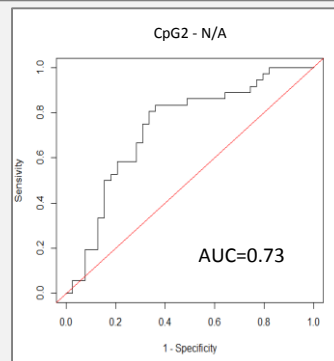**ASSAY 4**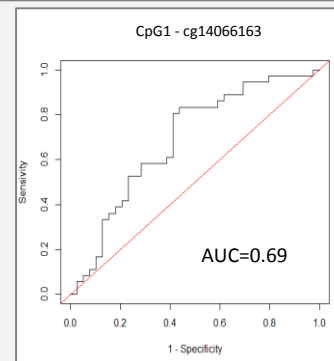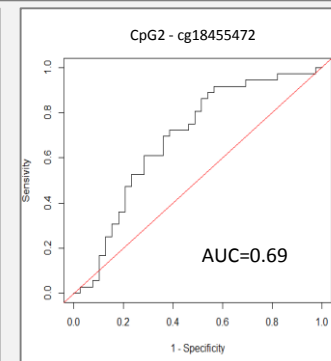**ASSAY 3**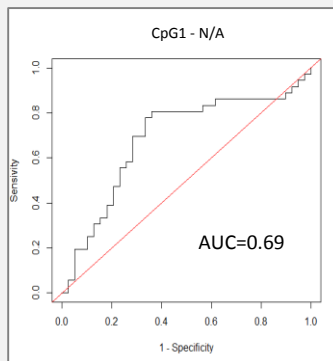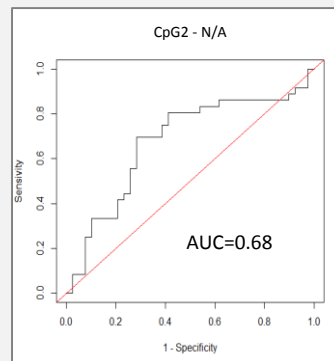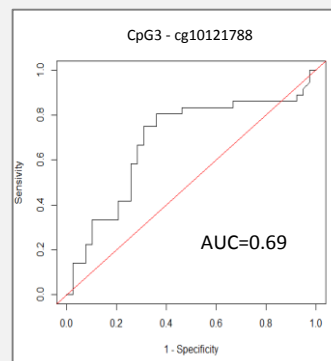**ASSAY 5**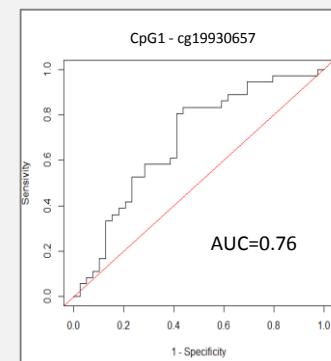

Supplementary Figure S2. ROC curves for individual CpGs in all 5 assays. AUC values are provided. N/A - CpG dinucleotide not annotated in GRCh37/hg19 database
