# Supplementary material for: Global DNA Methylation Profiling Reveals Differentially Methylated CpGs between Salivary Gland Pleomorphic Adenomas with Distinct Clinical Course
Source: MDPI journal article supplement (doi:10.3390/ijms23115962), 2022-05-25
Supplement: s1 [file s1]

Table S1. The list of CpG tags differentiating between fast-growing tumors (FGT) and slow-growing tumors (SGT)

| CG name    | Chromosome<br>(GRCh37/hg19) | Position<br>(GRCh37/hg19) | MMV<br>in FGT | SD<br>(FGT) | MMV<br>in SGT | SD<br>(SGT) | MMD<br>(FGT-SGT) |
|------------|-----------------------------|---------------------------|---------------|-------------|---------------|-------------|------------------|
| cg19312427 | chr1                        | 198174503                 | 0.76          | 0.10        | 0.36          | 0.06        | 0.40             |
| cg05822335 | chr1                        | 171179875                 | 0.58          | 0.15        | 0.18          | 0.09        | 0.41             |
| cg13548810 | chr1                        | 55349365                  | 0.87          | 0.07        | 0.45          | 0.10        | 0.41             |
| cg06748470 | chr1                        | 65467980                  | 0.84          | 0.09        | 0.42          | 0.11        | 0.42             |
| cg21159128 | chr1                        | 54693933                  | 0.75          | 0.13        | 0.32          | 0.18        | 0.43             |
| cg17361569 | chr1                        | 35965792                  | 0.88          | 0.04        | 0.41          | 0.19        | 0.47             |
| cg08308801 | chr10                       | 119867973                 | 0.79          | 0.06        | 0.32          | 0.12        | 0.46             |
| cg26508239 | chr10                       | 29759299                  | 0.85          | 0.14        | 0.43          | 0.15        | 0.42             |
| cg06838584 | chr11                       | 2504581                   | 0.73          | 0.12        | 0.30          | 0.11        | 0.43             |
| cg19345602 | chr11                       | 125615388                 | 0.76          | 0.08        | 0.35          | 0.19        | 0.41             |
| cg15175377 | chr11                       | 68920434                  | 0.78          | 0.05        | 0.22          | 0.20        | 0.57             |
| cg00143986 | chr12                       | 131606752                 | 0.93          | 0.01        | 0.24          | 0.04        | 0.69             |
| cg13930596 | chr12                       | 115108282                 | 0.69          | 0.01        | 0.17          | 0.06        | 0.52             |
| cg01078446 | chr12                       | 115113212                 | 0.77          | 0.09        | 0.36          | 0.07        | 0.41             |
| cg23764766 | chr12                       | 1459744                   | 0.63          | 0.15        | 0.17          | 0.10        | 0.46             |
| cg05950157 | chr12                       | 130603995                 | 0.81          | 0.14        | 0.40          | 0.11        | 0.41             |
| cg25428389 | chr12                       | 49277498                  | 0.85          | 0.06        | 0.41          | 0.15        | 0.44             |
| cg04660812 | chr12                       | 76054210                  | 0.73          | 0.09        | 0.31          | 0.16        | 0.42             |
| cg12496211 | chr12                       | 2193060                   | 0.79          | 0.05        | 0.31          | 0.16        | 0.48             |
| cg10731648 | chr12                       | 46745936                  | 0.75          | 0.06        | 0.34          | 0.17        | 0.41             |
| cg16406892 | chr12                       | 115118777                 | 0.88          | 0.01        | 0.46          | 0.17        | 0.41             |
| cg24009544 | chr12                       | 121613464                 | 0.77          | 0.13        | 0.29          | 0.17        | 0.48             |
| cg24401193 | chr13                       | 110996727                 | 0.81          | 0.04        | 0.33          | 0.15        | 0.48             |
| cg09310348 | chr14                       | 77371524                  | 0.66          | 0.05        | 0.20          | 0.03        | 0.46             |
| cg13261106 | chr14                       | 55999890                  | 0.69          | 0.16        | 0.28          | 0.05        | 0.41             |
| cg01333616 | chr14                       | 75722234                  | 0.67          | 0.06        | 0.22          | 0.11        | 0.46             |
| cg09964732 | chr14                       | 94998884                  | 0.70          | 0.05        | 0.28          | 0.12        | 0.42             |
| cg14496909 | chr15                       | 101729391                 | 0.77          | 0.16        | 0.35          | 0.04        | 0.42             |
| cg20661290 | chr15                       | 69545572                  | 0.68          | 0.10        | 0.27          | 0.07        | 0.40             |
| cg13271663 | chr15                       | 70387303                  | 0.63          | 0.14        | 0.23          | 0.13        | 0.41             |
| cg27554954 | chr15                       | 60691595                  | 0.81          | 0.06        | 0.36          | 0.14        | 0.45             |
| cg08884974 | chr15                       | 31505024                  | 0.83          | 0.05        | 0.38          | 0.16        | 0.45             |
| cg19335742 | chr15                       | 40566880                  | 0.85          | 0.07        | 0.40          | 0.18        | 0.45             |
| cg10121788 | chr16                       | 77469583                  | 0.62          | 0.12        | 0.12          | 0.03        | 0.50             |
| cg08418279 | chr16                       | 49733170                  | 0.75          | 0.10        | 0.34          | 0.12        | 0.41             |
| cg09417209 | chr16                       | 11715746                  | 0.70          | 0.08        | 0.18          | 0.16        | 0.52             |
| cg08249296 | chr16                       | 77469710                  | 0.71          | 0.10        | 0.19          | 0.17        | 0.52             |
| cg07749951 | chr16                       | 79352436                  | 0.82          | 0.10        | 0.41          | 0.20        | 0.40             |
| cg27419648 | chr17                       | 4757968                   | 0.79          | 0.16        | 0.37          | 0.06        | 0.41             |
| cg18455472 | chr17                       | 17311855                  | 0.82          | 0.04        | 0.35          | 0.12        | 0.47             |
| cg12968741 | chr17                       | 830967                    | 0.83          | 0.02        | 0.36          | 0.17        | 0.47             |
| cg14308452 | chr19                       | 5784184                   | 0.82          | 0.08        | 0.42          | 0.19        | 0.40             |
| cg15903609 | chr2                        | 148207352                 | 0.83          | 0.05        | 0.35          | 0.07        | 0.48             |
| cg06749642 | chr2                        | 114086683                 | 0.75          | 0.08        | 0.33          | 0.08        | 0.42             |
| cg08946713 | chr2                        | 191844998                 | 0.66          | 0.19        | 0.18          | 0.08        | 0.48             |

|            |       |           |      |      |      |      |      |
|------------|-------|-----------|------|------|------|------|------|
| cg04716277 | chr2  | 219625165 | 0.83 | 0.05 | 0.43 | 0.16 | 0.40 |
| cg01549082 | chr2  | 20350783  | 0.66 | 0.16 | 0.24 | 0.17 | 0.42 |
| cg26035105 | chr2  | 121105464 | 0.71 | 0.04 | 0.30 | 0.20 | 0.42 |
| cg13170954 | chr20 | 40619155  | 0.79 | 0.08 | 0.36 | 0.20 | 0.43 |
| cg23996696 | chr21 | 31322913  | 0.88 | 0.03 | 0.26 | 0.04 | 0.62 |
| cg01416479 | chr21 | 47796873  | 0.91 | 0.03 | 0.44 | 0.07 | 0.47 |
| cg06684407 | chr21 | 46356806  | 0.83 | 0.12 | 0.41 | 0.08 | 0.42 |
| cg01111856 | chr22 | 46508451  | 0.92 | 0.02 | 0.46 | 0.16 | 0.46 |
| cg24971189 | chr3  | 71294237  | 0.75 | 0.16 | 0.28 | 0.03 | 0.48 |
| cg03072598 | chr3  | 71294380  | 0.77 | 0.08 | 0.23 | 0.05 | 0.53 |
| cg22712970 | chr3  | 71106959  | 0.76 | 0.20 | 0.31 | 0.10 | 0.45 |
| cg15635553 | chr3  | 195339050 | 0.88 | 0.03 | 0.34 | 0.11 | 0.53 |
| cg19930657 | chr3  | 171529610 | 0.82 | 0.01 | 0.31 | 0.16 | 0.51 |
| cg02505331 | chr4  | 96560436  | 0.76 | 0.06 | 0.32 | 0.06 | 0.43 |
| cg10925937 | chr4  | 105890788 | 0.67 | 0.10 | 0.24 | 0.11 | 0.43 |
| cg03804409 | chr4  | 47216088  | 0.82 | 0.06 | 0.33 | 0.17 | 0.48 |
| cg05983326 | chr5  | 140710688 | 0.60 | 0.10 | 0.14 | 0.03 | 0.46 |
| cg18361975 | chr5  | 106738731 | 0.76 | 0.12 | 0.34 | 0.05 | 0.41 |
| cg08400424 | chr5  | 142357042 | 0.74 | 0.04 | 0.33 | 0.14 | 0.41 |
| cg24408662 | chr5  | 103079926 | 0.77 | 0.09 | 0.36 | 0.14 | 0.41 |
| cg24874236 | chr5  | 25490530  | 0.66 | 0.13 | 0.26 | 0.19 | 0.40 |
| cg25001484 | chr6  | 20302622  | 0.82 | 0.01 | 0.26 | 0.00 | 0.56 |
| cg04474876 | chr6  | 126193612 | 0.63 | 0.20 | 0.21 | 0.02 | 0.41 |
| cg21754524 | chr6  | 149175336 | 0.68 | 0.12 | 0.24 | 0.08 | 0.43 |
| cg12801037 | chr6  | 11793280  | 0.82 | 0.12 | 0.40 | 0.09 | 0.42 |
| cg08570639 | chr6  | 113371757 | 0.68 | 0.06 | 0.25 | 0.10 | 0.43 |
| cg12422716 | chr6  | 111968507 | 0.81 | 0.07 | 0.40 | 0.15 | 0.41 |
| cg10969178 | chr6  | 31838402  | 0.82 | 0.16 | 0.40 | 0.18 | 0.42 |
| cg00869930 | chr6  | 156904035 | 0.84 | 0.08 | 0.43 | 0.18 | 0.41 |
| cg14815476 | chr6  | 158463428 | 0.89 | 0.03 | 0.48 | 0.19 | 0.41 |
| cg06583111 | chr7  | 28575984  | 0.76 | 0.09 | 0.32 | 0.09 | 0.44 |
| cg20819752 | chr7  | 112060391 | 0.77 | 0.19 | 0.35 | 0.13 | 0.42 |
| cg08961454 | chr8  | 117243882 | 0.76 | 0.08 | 0.33 | 0.05 | 0.43 |
| cg13788620 | chr8  | 51306508  | 0.57 | 0.09 | 0.16 | 0.07 | 0.41 |
| cg02323453 | chr8  | 101475221 | 0.68 | 0.07 | 0.27 | 0.08 | 0.41 |
| cg04651963 | chr8  | 36896788  | 0.71 | 0.14 | 0.30 | 0.14 | 0.40 |
| cg27606001 | chr8  | 17549898  | 0.79 | 0.14 | 0.36 | 0.17 | 0.43 |
| cg01127608 | chr9  | 129377854 | 0.53 | 0.10 | 0.06 | 0.01 | 0.47 |
| cg04996334 | chr9  | 129381005 | 0.79 | 0.16 | 0.21 | 0.14 | 0.58 |
| cg14635269 | chr9  | 129439339 | 0.77 | 0.01 | 0.35 | 0.18 | 0.42 |

Analysis performed with the use of Infinium Human Methylation EPIC 850k BeadChip Array (Illumina). MMV - mean methylation value; SD - standard deviation; MMD - mean methylation difference
