# Supplementary material for: Global DNA Methylation Profiling Reveals Differentially Methylated CpGs between Salivary Gland Pleomorphic Adenomas with Distinct Clinical Course
Source: MDPI journal article supplement (doi:10.3390/ijms23115962), 2022-05-25
Supplement: s1 [file s1]

Table S2. The characteristics of 5 regions selected for DNA bisulfite pyrosequencing

| Region | CG name<br>(GRCh37/hg19) | Chromosome<br>(GRCh37/hg19) | Position<br>(GRCh37/hg19) | Region<br>length<br>(bp) | Fast-growing tumors |             |             |             |               |             | Slow-growing tumors |             |             |             |               |             | MMD<br>(FGT-<br>SGT) |
|--------|--------------------------|-----------------------------|---------------------------|--------------------------|---------------------|-------------|-------------|-------------|---------------|-------------|---------------------|-------------|-------------|-------------|---------------|-------------|----------------------|
|        |                          |                             |                           |                          | FGT-1               | FGT-2       | FGT-3       | FGT-4       | MMV<br>in FGT | SD<br>(FGT) | SGT-1               | SGT-2       | SGT-3       | SGT-4       | MMV<br>in SGT | SD<br>(SGT) |                      |
| 1      | <b>cg06748470</b>        | chr1                        | <b>65467980</b>           | 38                       | <b>0.74</b>         | <b>0.79</b> | <b>0.95</b> | <b>0.88</b> | <b>0.84</b>   | <b>0.09</b> | <b>0.52</b>         | <b>0.27</b> | <b>0.41</b> | <b>0.47</b> | <b>0.42</b>   | <b>0.11</b> | <b>0.42</b>          |
|        | cg09774749               |                             | 65467991                  |                          | 0.61                | 0.6         | 0.79        | 0.71        | 0.68          | 0.09        | 0.45                | 0.32        | 0.4         | 0.42        | 0.4           | 0.06        | 0.28                 |
|        | cg15208832               |                             | 65467997                  |                          | 0.64                | 0.6         | 0.83        | 0.76        | 0.71          | 0.1         | 0.46                | 0.32        | 0.38        | 0.41        | 0.39          | 0.06        | 0.32                 |
|        | cg00600454               |                             | 65468017                  |                          | 0.46                | 0.46        | 0.63        | 0.61        | 0.54          | 0.09        | 0.31                | 0.21        | 0.31        | 0.29        | 0.28          | 0.05        | 0.26                 |
| 2      | cg18413218               | chr14                       | 77371470                  | 55                       | 0.41                | 0.56        | 0.6         | 0.61        | 0.54          | 0.09        | 0.2                 | 0.16        | 0.21        | 0.21        | 0.19          | 0.02        | 0.35                 |
|        | <b>cg09310348</b>        |                             | <b>77371524</b>           |                          | <b>0.62</b>         | <b>0.61</b> | <b>0.71</b> | <b>0.67</b> | <b>0.66</b>   | <b>0.05</b> | <b>0.18</b>         | <b>0.16</b> | <b>0.23</b> | <b>0.21</b> | <b>0.2</b>    | <b>0.03</b> | <b>0.46</b>          |
| 3      | <b>cg10121788</b>        | chr16                       | <b>77469583</b>           | 128                      | <b>0.5</b>          | <b>0.57</b> | <b>0.77</b> | <b>0.65</b> | <b>0.62</b>   | <b>0.12</b> | <b>0.15</b>         | <b>0.09</b> | <b>0.13</b> | <b>0.11</b> | <b>0.12</b>   | <b>0.03</b> | <b>0.5</b>           |
|        | <b>cg08249296</b>        |                             | <b>77469710</b>           |                          | <b>0.57</b>         | <b>0.71</b> | <b>0.8</b>  | <b>0.77</b> | <b>0.71</b>   | <b>0.1</b>  | <b>0.03</b>         | <b>0.13</b> | <b>0.19</b> | <b>0.42</b> | <b>0.19</b>   | <b>0.17</b> | <b>0.52</b>          |
| 4      | <b>cg18455472</b>        | chr17                       | <b>17311855</b>           | 12                       | <b>0.78</b>         | <b>0.86</b> | <b>0.8</b>  | <b>0.84</b> | <b>0.82</b>   | <b>0.04</b> | <b>0.42</b>         | <b>0.45</b> | <b>0.35</b> | <b>0.17</b> | <b>0.35</b>   | <b>0.12</b> | <b>0.47</b>          |
|        | cg14066163               |                             | 17311866                  |                          | 0.85                | 0.85        | 0.85        | 0.87        | 0.86          | 0.01        | 0.57                | 0.7         | 0.54        | 0.25        | 0.52          | 0.19        | 0.34                 |
| 5      | cg14000730               | chr3                        | 171529077                 | 534                      | 0.49                | 0.43        | 0.55        | 0.65        | 0.53          | 0.09        | 0.28                | 0.22        | 0.2         | 0.28        | 0.24          | 0.04        | 0.29                 |
|        | cg26752773               |                             | 171529090                 |                          | 0.79                | 0.69        | 0.71        | 0.76        | 0.74          | 0.05        | 0.61                | 0.22        | 0.23        | 0.32        | 0.34          | 0.19        | 0.39                 |
|        | <b>cg19930657</b>        |                             | <b>171529610</b>          |                          | <b>0.83</b>         | <b>0.81</b> | <b>0.81</b> | <b>0.83</b> | <b>0.82</b>   | <b>0.01</b> | <b>0.49</b>         | <b>0.23</b> | <b>0.13</b> | <b>0.38</b> | <b>0.31</b>   | <b>0.16</b> | <b>0.51</b>          |

Primarily selected six CpGs are bolded. The remaining CpGs are located in close proximity. MMV - mean methylation value; SD - standard deviation; MMD - mean methylation difference
