# Supplementary material for: Global DNA Methylation Profiling Reveals Differentially Methylated CpGs between Salivary Gland Pleomorphic Adenomas with Distinct Clinical Course
Source: MDPI journal article supplement (doi:10.3390/ijms23115962), 2022-05-25
Supplement: s1 [file s1]

Table S4. The clinical characteristics of PA patients

|                                   | Total | FGT   | SGT   |
|-----------------------------------|-------|-------|-------|
| Number                            |       |       |       |
|                                   | 75    | 36    | 39    |
| Age (years)                       |       |       |       |
| Median                            | 43    | 43    | 44    |
| Range                             | 15-76 | 15-76 | 22-67 |
| Sex                               |       |       |       |
| Female                            | 48    | 21    | 27    |
| Male                              | 27    | 15    | 12    |
| Treatment                         |       |       |       |
| ECD                               | 9     | 5     | 4     |
| Partial superficial parotidectomy | 12    | 6     | 6     |
| Superficial parotidectomy         | 21    | 9     | 12    |
| Subtotal parotidectomy            | 16    | 10    | 6     |
| Total parotidectomy               | 8     | 4     | 4     |
| SGD                               | 9     | 2     | 7     |

ECD - extracapsular dissection

SGD - salivary gland dissection
