# Supplementary material for: Global DNA Methylation Profiling Reveals Differentially Methylated CpGs between Salivary Gland Pleomorphic Adenomas with Distinct Clinical Course
Source: MDPI journal article supplement (doi:10.3390/ijms23115962), 2022-05-25
Supplement: s1 [file s1]

Table S5. The characteristics of the used pyrosequencing assays

| Pyrosequencing assay no. | Primer | Primer sequence 5'-3'                | Annealing temperature | Product size (bp) | Localization (GRCh37/hg19)   | Number of analyzed CpG |
|--------------------------|--------|--------------------------------------|-----------------------|-------------------|------------------------------|------------------------|
| 1                        | F      | GGGTAAATGAGTGAGTTTTAGTTAGAA          | 53°C                  | 141               | chr1:65,467,920-65,468,060   | 5                      |
|                          | R      | biotin-CCCTTAAATCAACCACTAAATAACTT    |                       |                   |                              |                        |
|                          | S      | TTGTTTTGGGTAGTGGG                    | Sequencing primer     |                   |                              |                        |
| 2                        | F      | biotin-GAAGTAATGTTTAAAGGGTATTGG      | 55°C                  | 173               | chr14:77,371,429-77,371,601  | 2                      |
|                          | R      | CCAACCTACTAATTACTAAACATTTTATAC       |                       |                   |                              |                        |
|                          | S      | ACTCTACACTTAATAACTA                  | Sequencing primer     |                   |                              |                        |
| 3                        | F      | TTGGGTATTTGGGGTTAAGATTTAA            | 55°C                  | 146               | chr16:77,469,489-77,469,634  | 3                      |
|                          | R      | biotin-ACCAAAACAATAAACTATCACTATCTAC  |                       |                   |                              |                        |
|                          | S      | GGTATTTGGGGTTAAGATTTAAT              | Sequencing primer     |                   |                              |                        |
| 4                        | F      | AGGATTGTTTATAGATATTAAGGTTATGAA       | 55°C                  | 94                | chr17:17,311,818-17,311,911  | 2                      |
|                          | R      | biotin-ATTCTTTCTCATTTCCAAATCTCAC     |                       |                   |                              |                        |
|                          | S      | ATAGATATTAAGGTTATGAAAGATA            | Sequencing primer     |                   |                              |                        |
| 5                        | F      | GTTATAGATGGTTTGATAAGTTTTGTGT         | 56°C                  | 153               | chr3:171,529,577-171,529,729 | 1                      |
|                          | R      | biotin-ACAAATACCAAATATTTTCATAATAACAC |                       |                   |                              |                        |
|                          | S      | GGTTTGATAAGTTTTGTGTA                 | Sequencing primer     |                   |                              |                        |

F-forward primer; R-reverse primer; S-sequencing primer
