# Supplementary material for: Global DNA Methylation Profiling Reveals Differentially Methylated CpGs between Salivary Gland Pleomorphic Adenomas with Distinct Clinical Course
Source: MDPI journal article supplement (doi:10.3390/ijms23115962), 2022-05-25
Supplement: s1 [file s1]

Table S6. The composition of PCR reaction mixture (A) and the PCR reaction conditions (B)

**A**

|                                     |                                                                                   |
|-------------------------------------|-----------------------------------------------------------------------------------|
| <b>PCR<br/>reaction<br/>mixture</b> | <b>Total vol - 25 ul</b>                                                          |
|                                     | 1x PyroMark Master Mix (HotStarTaq DNA Polymerase, dNTPs, 1x PyroMark PCR Buffer) |
|                                     | 10 pmol of each primer                                                            |
|                                     | 1x Coral Load Concentrate                                                         |
|                                     | 1 ul of converted DNA                                                             |

**B**

|                                  |                         |           |         |           |
|----------------------------------|-------------------------|-----------|---------|-----------|
| Pyrosequencing<br>PCR conditions | Step                    | Temp [°C] | Time    |           |
|                                  | Initial heat activation | 95        | 15 min. |           |
|                                  | Denaturation            | 94        | 30 sec. | 45 cycles |
|                                  | Annealing               | 53-56*    | 30 sec. |           |
|                                  | Extension               | 72        | 30 sec. |           |
|                                  | Final extension         | 72        | 10 min. |           |

\*The annealing temperature depends on the used primers
