# Supplementary material for: Global DNA Methylation Profiling Reveals Differentially Methylated CpGs between Salivary Gland Pleomorphic Adenomas with Distinct Clinical Course
Source: MDPI journal article supplement (doi:10.3390/ijms23115962), 2022-05-25
Supplement: s1 [file s1]

Table S3. The genomic coordinates of CpG dinucleotides included in each pyrosequencing assay

| Pyrosequencing assay no. | CpG no. | CpG name   | Chromosomal localization (GRCh37/hg19) |
|--------------------------|---------|------------|----------------------------------------|
| <b>1</b>                 | CpG1    | cg06748470 | chr1:65,467,980-65,467,981             |
|                          | CpG2    | N/A        | chr1:65,467,986-65,467,987             |
|                          | CpG3    | cg09774749 | chr1:65,467,991-65,467,992             |
|                          | CpG4    | cg15208832 | chr1:65,467,997-65,467,998             |
|                          | CpG5    | cg00600454 | chr1:65,468,017-65,468,018             |
| <b>2</b>                 | CpG1    | cg09310348 | chr14:77,371,524-77,371,525            |
|                          | CpG2    | N/A        | chr14:77,371,501-77,371,502            |
| <b>3</b>                 | CpG1    | N/A        | chr16:77,469,605-77,469,606            |
|                          | CpG2    | N/A        | chr16:77,469,589-77,469,590            |
|                          | CpG3    | cg10121788 | chr16:77,469,583-77,469,584            |
| <b>4</b>                 | CpG1    | cg14066163 | chr17:17,311,866-17,311,867            |
|                          | CpG2    | cg18455472 | chr17:17,311,855-17,311,856            |
| <b>5</b>                 | CpG1    | cg19930657 | chr3:171,529,610-171,529,611           |

N/A - CpG dinucleotide not annotated in GRCh37/hg19 database.

In assay number 5, only one tag (cg19930657) was analyzed, due to the long distance from other adjacent tags with similar methylation pattern.
